# Supplementary material for: Local barrier dysfunction identified by confocal laser endomicroscopy predicts relapse in inflammatory bowel disease
Source: PubMed Central journal article supplement — Gut. 2011 Nov 24;61(8):1146–53. doi: 10.1136/gutjnl-2011-300695 (PMC3388727; doi:10.1136/gutjnl-2011-300695), 2011-11-24
Supplement: gutjnl-2011-300695-s1.pdf [file gutjnl-2011-300695-s1.pdf]

## ***Supplemental methods***

### ***Confocal Laser Microscopy of mice***

C57BL/6 male mice were housed in specific pathogen free conditions with a 12:12 hour light, dark cycle. To prevent possible diurnal rhythm effects, mice were all anaesthetised at 9:30 am. A laparotomy was performed to exteriorise a 2cm segment of small intestine as previously described.[26] The exteriorised small intestine was bathed in either an isosmolar ( $\text{Na}^+$  87,  $\text{K}^+$  15,  $\text{Ca}^{2+}$  2,  $\text{Cl}^-$  79,  $\text{HCO}_3^-$  23, Glucose 90 mM; 300mOsm) or hyposmolar ( $\text{Na}^+$  60,  $\text{K}^+$  15,  $\text{Ca}^{2+}$  2,  $\text{Cl}^-$  52,  $\text{HCO}_3^-$  23, Glucose 90 mM; 246mOsm) solution containing FITC-conjugated dextran (4KDa; 20 $\mu\text{g}/\text{ml}$ ; Sigma). Hoechst 33342 (5mg/kg; Invitrogen) as a nuclear dye and Alexa-fluor conjugated dextran 647 (10KDa; 4mg/kg; Invitrogen, Paisley, Scotland) as an intravenous permeability probe were administered intravenously immediately prior to imaging. Multiphoton and confocal images were obtained using a Leica DMIRE2 laser scanning confocal microscope and a x20 air objective. Image stacks were collected every 90 seconds for 2 hour periods. Nuclei stained by Hoechst 33342 were visualised by 748nm multi-photon excitation and 435-485 emission. Luminally administered dextrans were imaged by 488nm argon/krypton laser excitation and 508-569nm emission. Intravenous dextrans were visualised by 633nm neon laser excitation and 653-795nm emission. Images were analysed and movies generated using Leica software and Image J ([Imagej.nih.gov/ij/](http://imagej.nih.gov/ij/), NIH, Bethesda, USA).
