# Supplementary material for: Local barrier dysfunction identified by confocal laser endomicroscopy predicts relapse in inflammatory bowel disease
Source: PubMed Central journal article supplement — Gut. 2011 Nov 24;61(8):1146–53. doi: 10.1136/gutjnl-2011-300695 (PMC3388727; doi:10.1136/gutjnl-2011-300695), 2011-11-24
Supplement: gutjnl-2011-300695-s2.pdf [file gutjnl-2011-300695-s2.pdf]

**Supplementary Table 1: Patient characteristics – retrospective study of archived images**

|                    | <i>Number</i> | <i>Gender</i> | <i>Age</i><br>(years ± SD) | <i>Duration of disease</i><br>(years ± SD) | <i>Topography</i>                                   | <i>Clinical score</i><br>CAI, CDAI |
|--------------------|---------------|---------------|----------------------------|--------------------------------------------|-----------------------------------------------------|------------------------------------|
| Ulcerative colitis | 6             | 2 Female      | 47 ± 16                    | 16.3 ± 7.2                                 | 3 pancolitis<br>2 left-sided colitis<br>1 proctitis | 0.5 ± 0.54                         |
| Crohn's disease    | 7             | 4 Female      | 42 ± 17                    | 17 ± 6.7                                   | 5 ileocolitis<br>1 ileitis<br>1 colitis             | 93 ± 33                            |
| Controls           | 12            | 9 Female      | 59 ± 17                    | -                                          | -                                                   | -                                  |
