# Supplementary material for: Local barrier dysfunction identified by confocal laser endomicroscopy predicts relapse in inflammatory bowel disease
Source: PubMed Central journal article supplement — Gut. 2011 Nov 24;61(8):1146–53. doi: 10.1136/gutjnl-2011-300695 (PMC3388727; doi:10.1136/gutjnl-2011-300695), 2011-11-24
Supplement: gutjnl-2011-300695-s3.pdf [file gutjnl-2011-300695-s3.pdf]

**Supplementary Table 2: Patient characteristics – prospective study**

|                    | <i>Number</i> | <i>Gender</i> | <i>Age</i><br>(years ± SD) | <i>Duration of disease</i><br>(years ± SD) | <i>Topography before clinical remission</i>            | <i>Clinical score</i><br>CAI, CDAI on initial CLE |
|--------------------|---------------|---------------|----------------------------|--------------------------------------------|--------------------------------------------------------|---------------------------------------------------|
| Ulcerative colitis | 47            | 23 Female     | 51 ± 12                    | 18.4 ± 9.2                                 | 19 pancolitis<br>12 left-sided colitis<br>16 proctitis | 0.4 ± 0.42                                        |
| Crohn's disease    | 11            | 6 Female      | 48 ± 16                    | 15 ± 7.2                                   | 7 ileocolitis<br>2 ileitis<br>2 colitis                | 65 ± 111                                          |
